# Supplementary material
Source: MDPI journal article supplement (https://www.mdpi.com/2073-4441/10/2/183)
Supplement: s1 [file s1]

**Supplementary Table 1.** Range of physico-chemical and microbiological characteristics for locations in which pollution is classified as relatively low, moderate or high.

| **Parameter** | **Cluster 1 – Relatively low pollution**  **Locations: 6,7,8,9,10,11,13,17)** | **Cluster 2 - Highly Polluted Locations: 4,5,15,16** | **Cluster 3- Moderately polluted locations: 2,3,12,14,20,21** |
| --- | --- | --- | --- |
| pH | 7.25-7.67 | 7.25-7.88 | 7.3-7.86 |
| Conductivity | 125-257 | 143-400 | 136-356 |
| TN (mg/L) | 2.25-3.69 | 2.40-3.74 | 1.31-3.47 |
| TP (µg/L) | 53.4-112.6 | 74.89-187.4 | 64.6-140.4 |
| NO3-N (mg/L) | 1.75-3.51 | 0.96-3.34 | 0.37-3.42 |
| NO2-N (mg/L) | 0.03-0.08 | 0.01-0.18 | 0.01-0.16 |
| PO4-P (µg/L) | 9.01-30.7 | 3.51-50.9 | 2.46-37.6 |
| NH4-N (mg/L) | 0.04-0.52 | 0.04-1.01 | 0.03-0.73 |
| TOC (mg/L) | 2.39-11.31 | 1.97-16.71 | 2.27-15.81 |
| Chl *a* (µg/L) | 29.88-79.6 | 37.82-86.7 | 26.8-102.3 |
| TVC (CFU/mL) | 3040-9800 | 4190-22050 | 1150-15500 |
| TC (CFU/mL) | 50-2766 | 145-4133 | 175-2133 |
| FC (CFU/100mL) | 100-2800 | 450-4325 | 150-2600 |
